# Supplementary material
Source: PubMed Central journal article supplement (PMC9534689)
Supplement: NIHMS1840070-supplement-All_Supplemental_Figures.pdf [file NIHMS1840070-supplement-All_Supplemental_Figures.pdf]

1 **Supplementary figures**

2

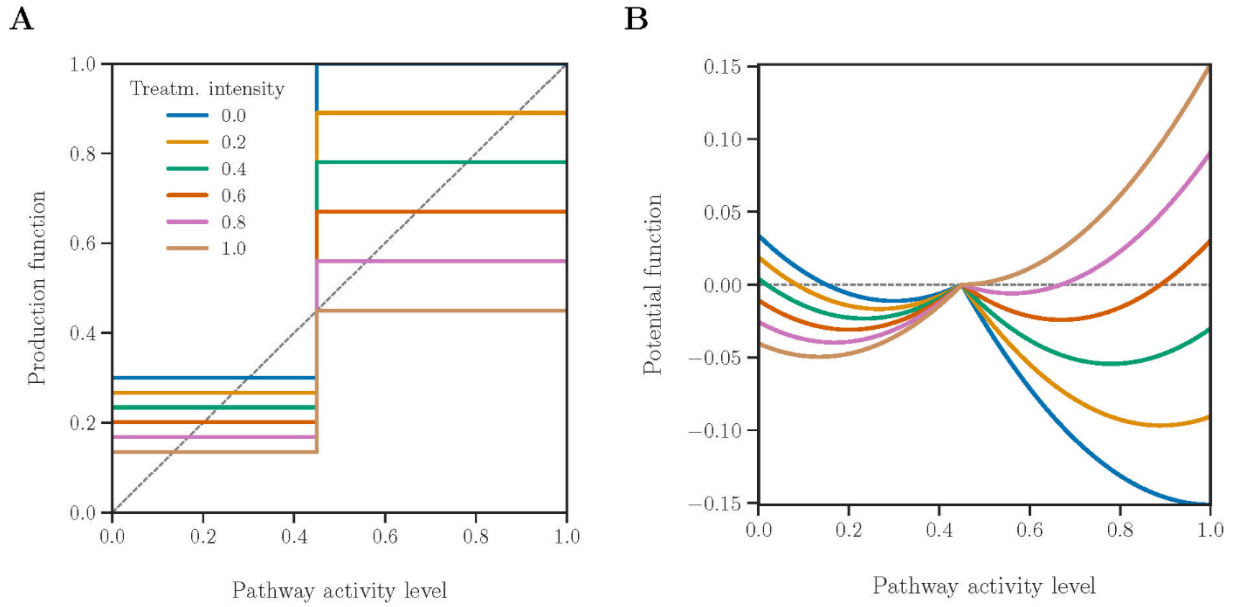

3

4 **Fig S1: Production function (A) and corresponding set of potentials (B) under varied**  
5 **treatment intensities.** The grey dashed in B indicates the zero level in the potential.

6

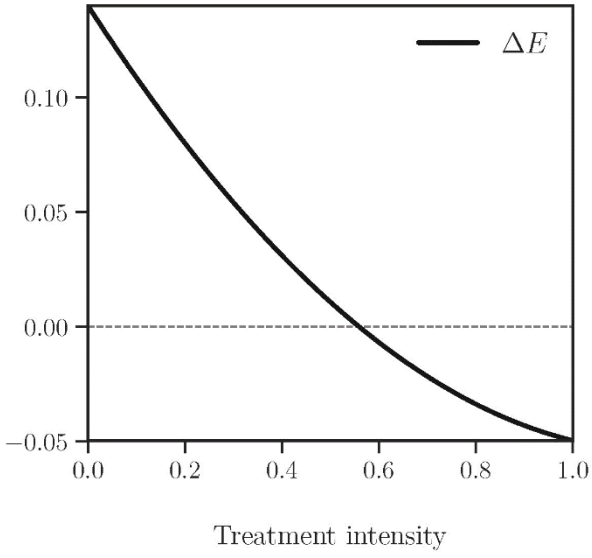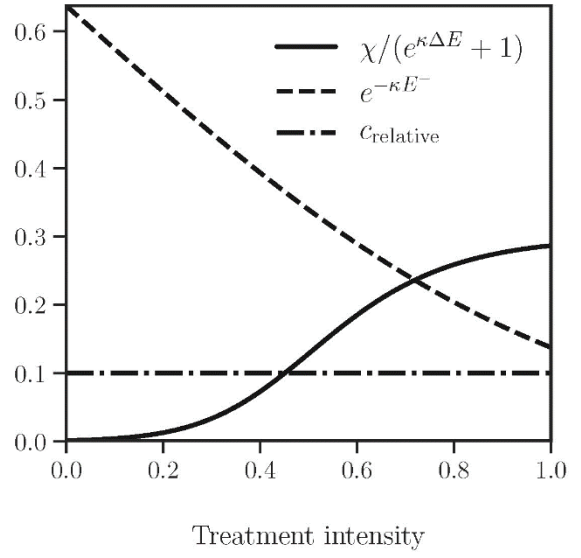

1

2 **Fig S2: Main characteristics of the equations (5)–(6) as the functions of treatment intensity.**

3

1  
2

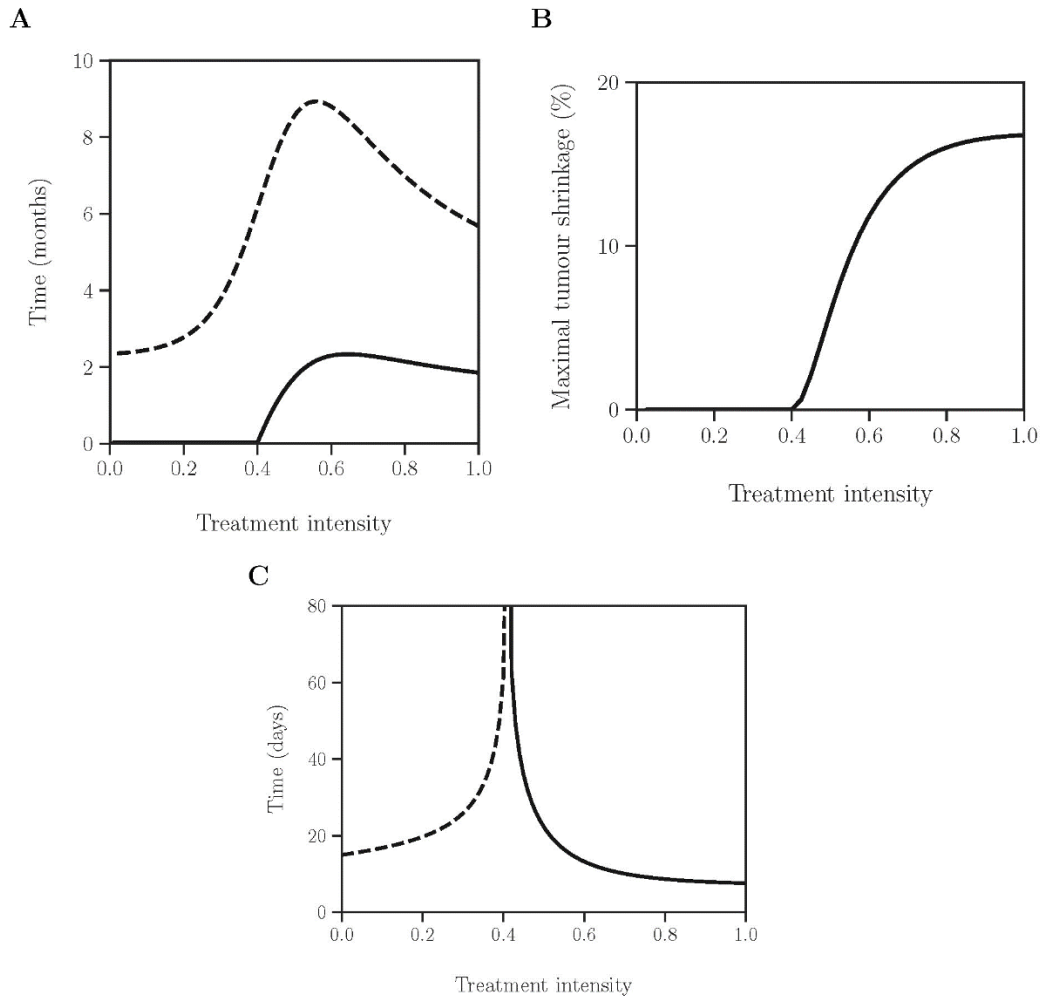

3

4 **Fig S3:** (A) Relapse times of returning to the initial size for tumours under static treatments (the  
5 solid line). For comparison, the dashed line indicates the time necessary for a two-fold increase in  
6 size. (B) Maximal tumour shrinkage observed during the static treatment. (C) Time necessary to  
7 acquire 50%-level of resistance starting from the initial 0% (solid) vs. the time necessary to lower  
8 the resistance level from the initial 100% to 50% (dashed) under the static treatment regimen.

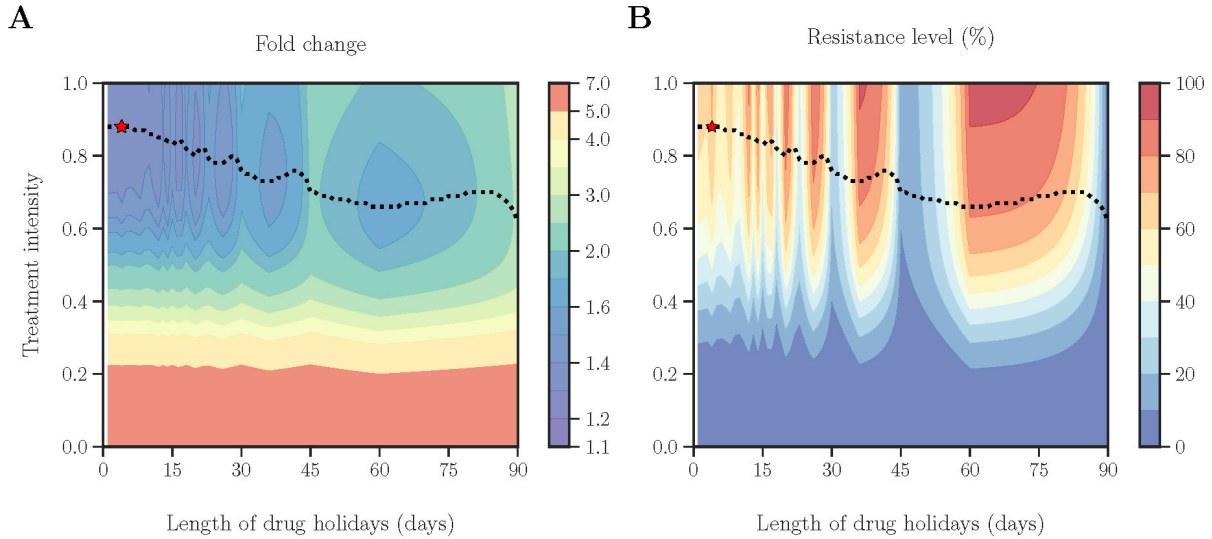

1

2 **Fig S4: Analysis of periodic treatment regimen with equal durations of active phases and**  
 3 **drug holidays.** The fold change in tumour size after six months of treatment (A), and the final  
 4 resistance level within a tumour (B) are characterized by repeating patterns. A line of dots  
 5 represents the minima in fold change for fixed length of active phases/drug holidays and varied  
 6 average treatment intensity. The red star indicates the global minimum.

7

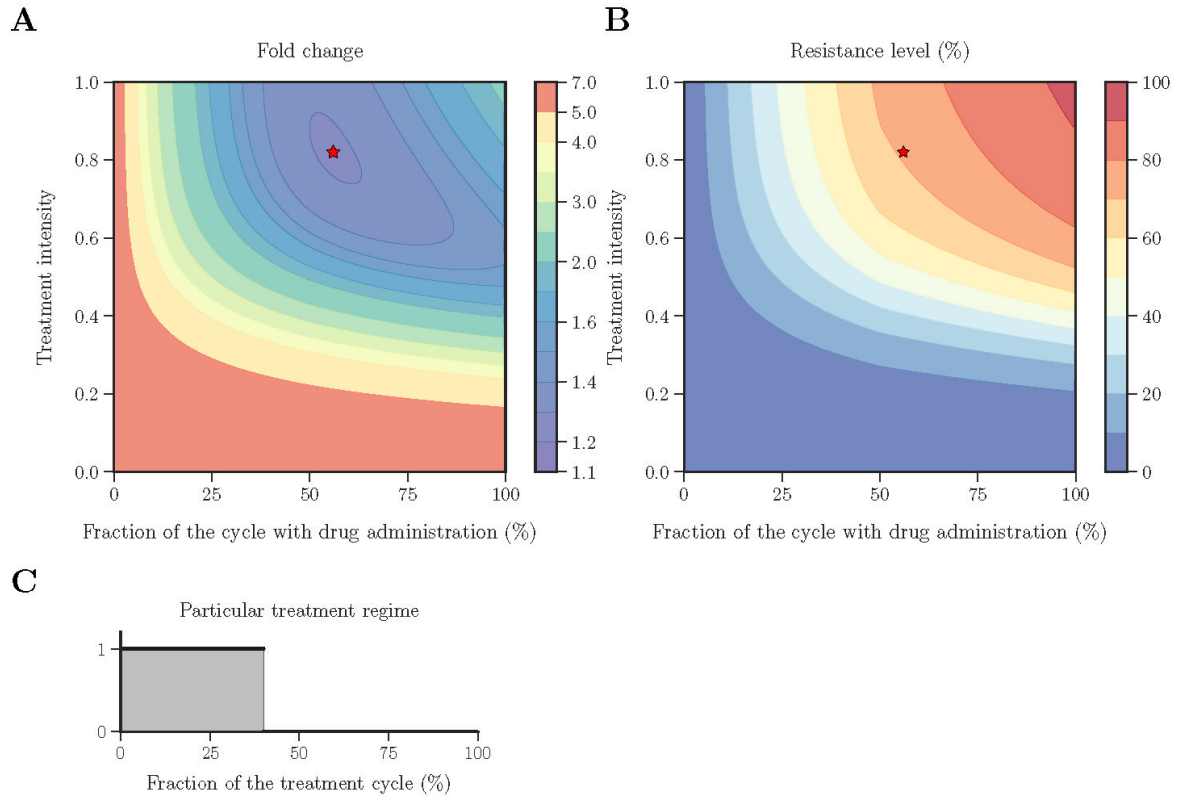

1

2 **Fig S5: Outcomes of the periodic treatment with 8-day periods of varying duty cycles (ratio**  
 3 **of the active phase duration to the duration of the period): fold change in tumour size (A),**  
 4 **final resistance level (B).** (C) illustrates the asymmetry in the treatment schedule and the applied  
 5 treatment intensity during the active phase.

6

A

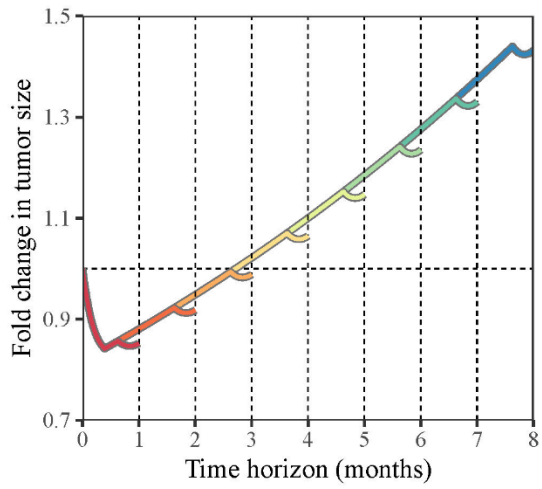

B

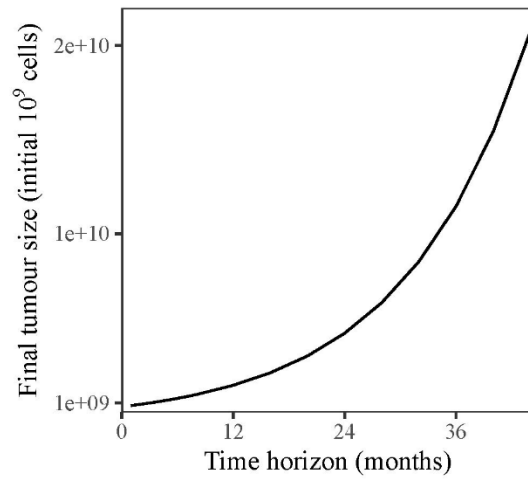

1

2 **Fig S6: (A)** Realization of optimal treatments with different terminal times. **(B)** Tumour sizes at  
3 the termination of the optimal treatment schedule.

4

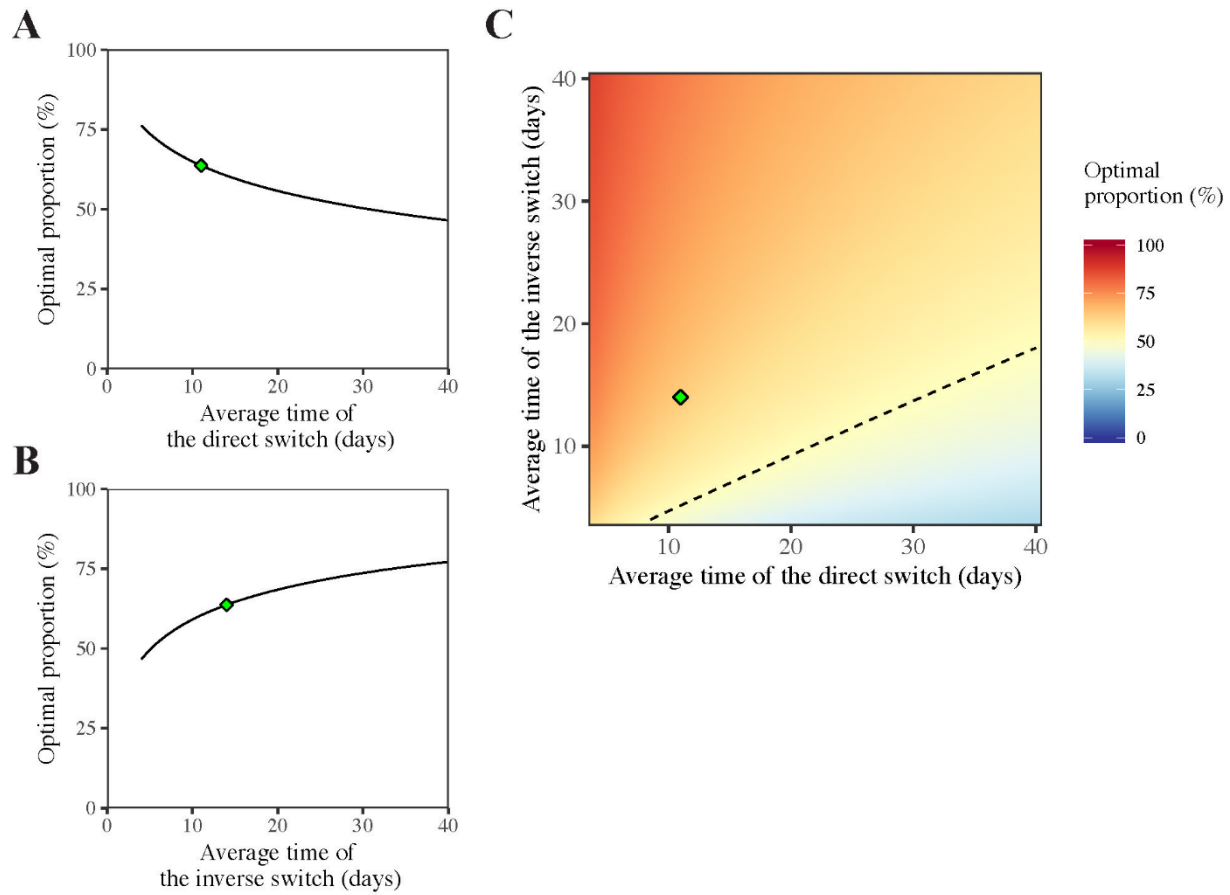

1

2 **Fig S7: Optimal balance between sensitive and resistant cells as a result of optimal problem.**

3 (AB) The change in optimal proportion when one of switching rate is fixed at its baseline value

4 (Table 1). (C) Variation in optimal proportion for varied characteristic times. Dashed line indicates

5 the optimal proportion at 50%.

6

1

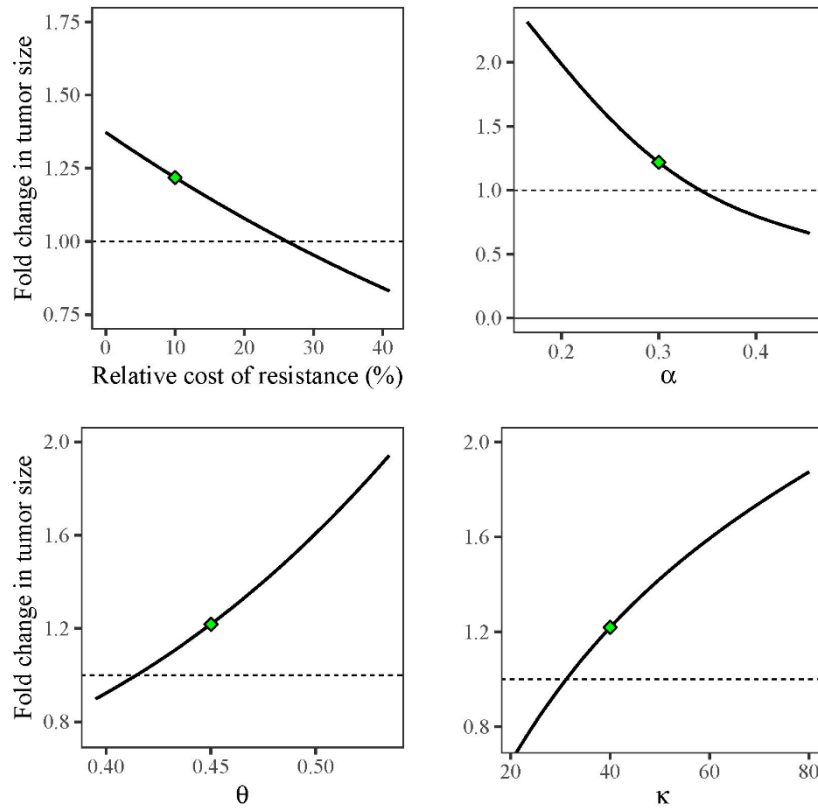

2

3 **Fig S8: Effects of single parameter values on the optimal outcome of the six months**  
4 **treatment.** Other parameters remain fixed according to Table 1. The baseline parameters set and  
5 the corresponding outcome are shown as green points. The fold-change of level one is shown by  
6 dashed horizontal lines.

7
